# Supplementary material for: Differences in Thermo-Rheological Structure between Qiongdongnan Basin and Pearl River Mouth Basin: Implications for the Extension Model in the Northwestern Margin of the South China Sea
Source: MDPI journal article supplement (doi:10.3390/jmse11020443), 2023-02-17
Supplement: s1 [file s1]

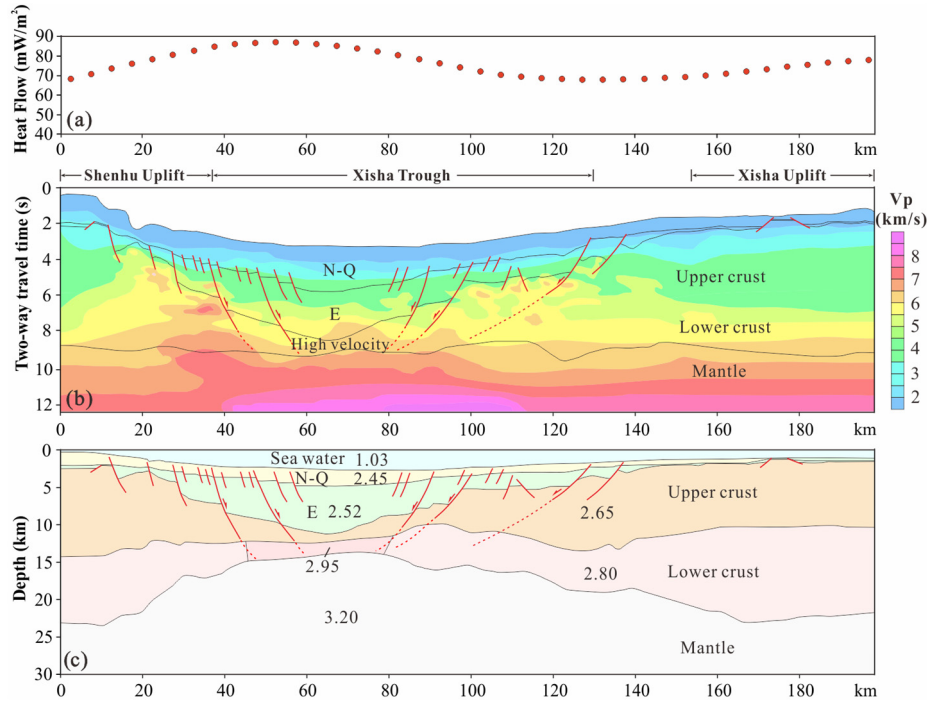

**Figure S1.** (a) The variation of surface heat flow digitized from the heat flow map of Figure 2 along profile L1. (b) Crustal structure from the multi-channel seismic reflection profile L1 [25]. (c) 2D density structure of lithosphere along profile L1 [25]. N-Q, late Oligocene–Holocene; E, Paleocene–early Oligocene. See Figure 1 for locations.

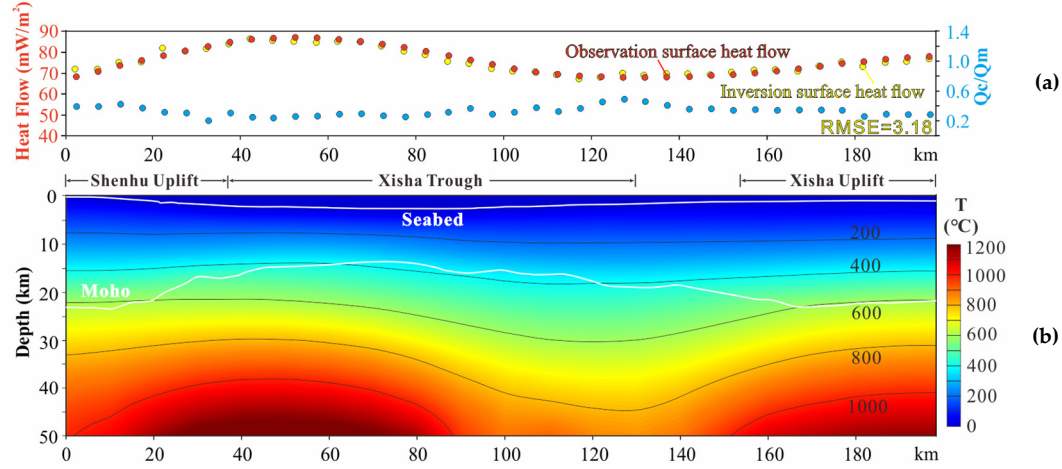

**Figure S2.** (a) The heat flow from observation and inversion along profile L1 are represented by red and blue points, respectively. The ratio between crustal heat flow and mantle heat flow is indicated by yellow points.  $Q_c$ , crustal heat flow;  $Q_m$ , mantle heat flow. (b) Thermal structure calculated from the simulation of profile L1
